# Supplementary material for: NKG2A gene variant predicts outcome of immunotherapy in AML and modulates the repertoire and function of NK cells
Source: PubMed Central journal article supplement (PMC10471874; doi:10.1136/jitc-2023-007202), 2023-08-30
Supplement: jitc-2023-007202supp001.pdf [file jitc-2023-007202supp001.pdf]

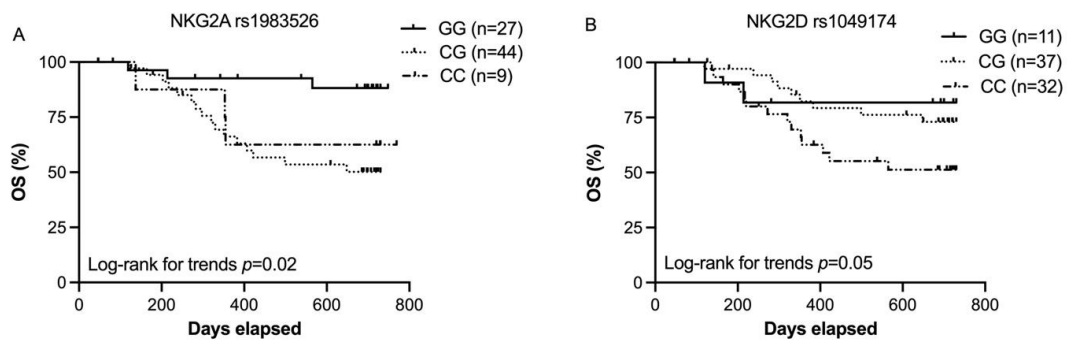

**Supplemental Figure 1. Impact of NKG2A and NKG2D gene variants on outcome of immunotherapy in AML.** (A) Overall survival of AML patients carrying NKG2A GG (n = 27), CG (n = 44) or CC (n=9) after receiving HDC/IL-2 treatment. (B) Overall survival of AML patients based on NKG2D GG (n = 11), CG (n = 37) or CC (n=32) after receiving HDC/IL-2 treatment.

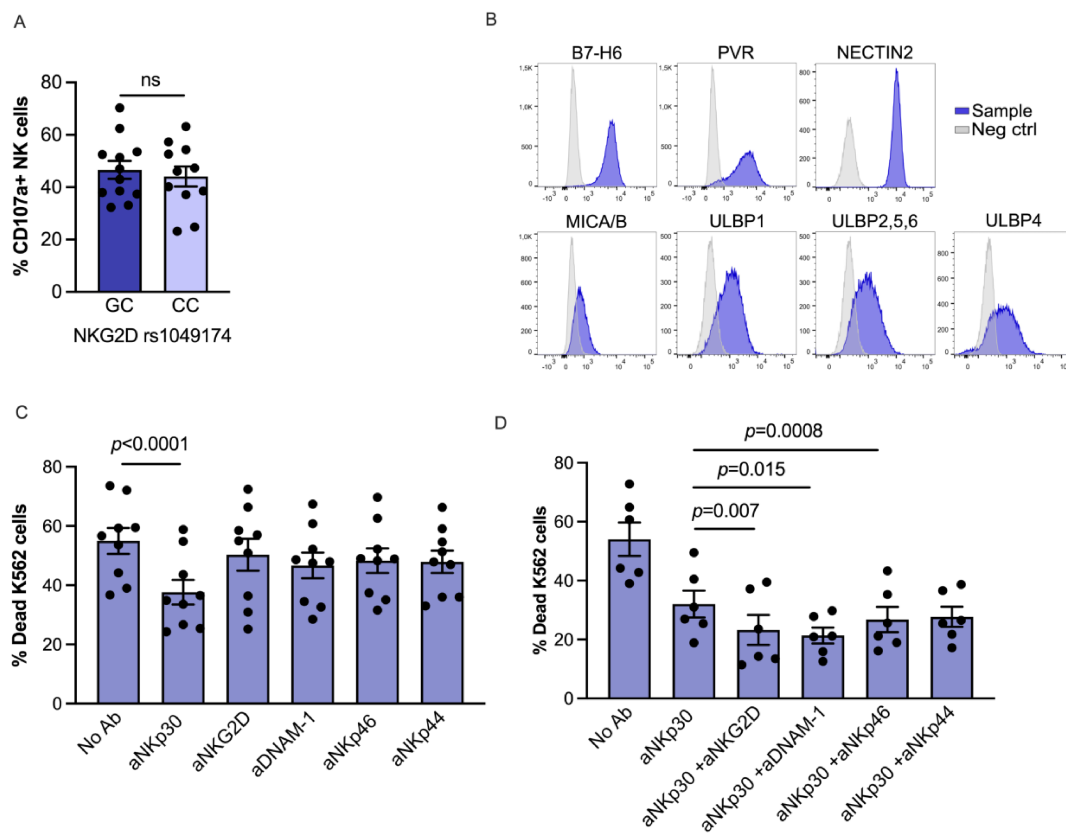

**Supplemental Figure 2. Generation of an NKG2D-dependent model.** (A) Degranulation assay of NK cells from healthy donors with NKG2D GC (n=12) or CC (n=11) pre-activated with IL-2 and cocultured with wild type K562. (B) Phenotype staining by flow cytometry of important NK cell receptor ligands on K562 wild type cells using fluorochrome-conjugated antibodies. (C-D) Cytotoxicity assay of healthy donor polyclonally activated NK cells against wild type K562 in presence and absence of different activating NK cell receptor blockade; single blockade (n=9) and anti-NKp30-combined blockade (n=6).

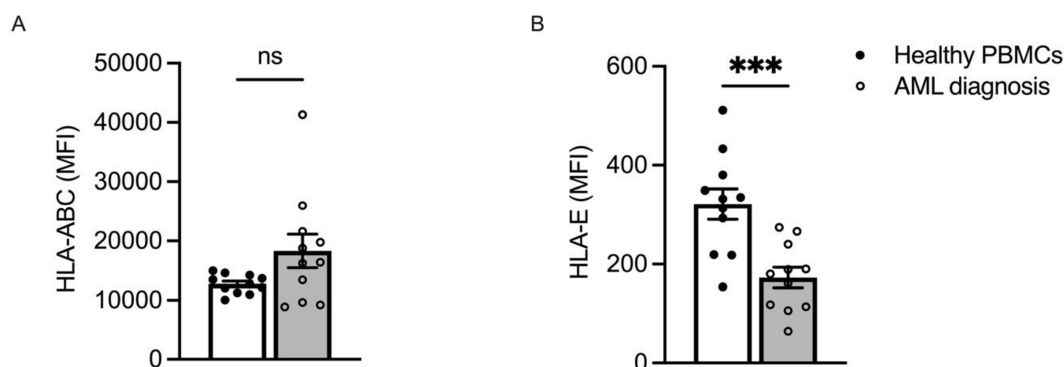

**Supplemental Figure 3. Expression of MHC class I and HLA-E.** (A) Expression of HLA-ABC and (B) HLA-E on PBMCs from healthy donors (n=11) and on CD34+ AML blasts (n=11).

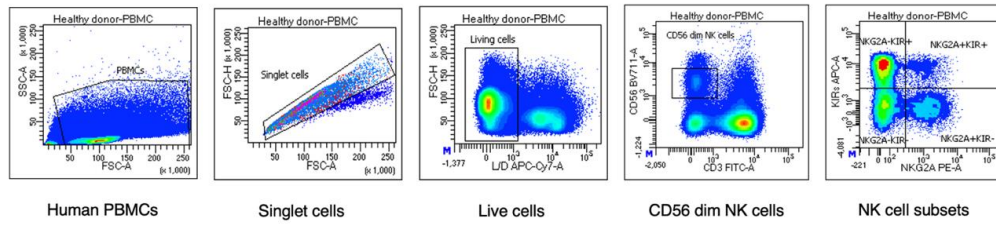

**Supplemental Figure 4. Flow cytometry gating strategy to identify NK cell subsets.**

**Supplemental Table 1.** Insert and crRNA sequences for cloning of plasmids needed for knock-out of ligand genes in target cell line. Primer sequences for PCR and qPCR.

| Name                  | Sequence (5'→3')                                                                                                                                                                                                                                                                                                                                                                                                                                       |
|-----------------------|--------------------------------------------------------------------------------------------------------------------------------------------------------------------------------------------------------------------------------------------------------------------------------------------------------------------------------------------------------------------------------------------------------------------------------------------------------|
| Insert                | tgctgtctcgagtaagtaataaacgttgcttaacgtctatcggccgattcgtatta<br>gctcggtcgattcgtcggcctatttccatgattcctcatattgcataacga<br>tacaaggctgttagagagataattggaattaattgactgtaaacacaaagatatt<br>agtacaaaafacgtgacgtagaaagtaataatttcttggtagtttgagttttaa<br>attatgttttaaatggactatcatatgcttaccgtaactgaaagtatttcgatttctt<br>ggcttatatatcttggaaaggacgaacaccgggtcttcgagaagacctgtttta<br>gagctagaaatagcaagttaaaataaggctagtccttatcaactgaaaaagtgg<br>caccgagtcgggtcggatccgctcgtga |
| crRNA NCR3LG1         | CACCAAGAGGCATTCCGACC                                                                                                                                                                                                                                                                                                                                                                                                                                   |
| crRNA PVR             | CCTGTTCGTCACGTTCCCGC                                                                                                                                                                                                                                                                                                                                                                                                                                   |
| crRNA NECTIN2         | GCGAGTTCAAGTGCTACCCG                                                                                                                                                                                                                                                                                                                                                                                                                                   |
| PCR primer NCR3LG1_F  | CCTCCAGATACCATCACACT                                                                                                                                                                                                                                                                                                                                                                                                                                   |
| PCR primer NCR3LG1_R  | AAGTGGAGCTCAAAGAGGTG                                                                                                                                                                                                                                                                                                                                                                                                                                   |
| PCR primer PVR_F      | CAAGTTGCAGACCATCCCAG                                                                                                                                                                                                                                                                                                                                                                                                                                   |
| PCR primer PVR_R      | GGGGGTCCTTACTCCCTGAG                                                                                                                                                                                                                                                                                                                                                                                                                                   |
| PCR primer NECTIN2_F  | CACACCTCGGAACATGAACA                                                                                                                                                                                                                                                                                                                                                                                                                                   |
| PCR primer NECTIN2_R  | GCGCCCAGCCAATACTTATT                                                                                                                                                                                                                                                                                                                                                                                                                                   |
| qPCR primer NCR3LG1_F | GCTGACGACCGAAGGTGAT                                                                                                                                                                                                                                                                                                                                                                                                                                    |
| qPCR primer NCR3LG1_R | GTGATGTTGAGGGGTTGGGA                                                                                                                                                                                                                                                                                                                                                                                                                                   |
| qPCR primer PVR_F     | GTGGACGGCAAGAATGTGAC                                                                                                                                                                                                                                                                                                                                                                                                                                   |
| qPCR primer PVR_R     | ATCATAGCCAGAGATGGATACCT                                                                                                                                                                                                                                                                                                                                                                                                                                |
| qPCR primer NECTIN2_F | GAGGACGAGGGCAACTACAC                                                                                                                                                                                                                                                                                                                                                                                                                                   |
| qPCR primer NECTIN2_R | TGGTTCTTGGGCTTGGCTAT                                                                                                                                                                                                                                                                                                                                                                                                                                   |
| qPCR primer MICA/B_F  | AAGGACCAGAAAGGAGGCTT                                                                                                                                                                                                                                                                                                                                                                                                                                   |
| qPCR primer MICA/B_R  | TCCCATCGTAGTAGAAATGC                                                                                                                                                                                                                                                                                                                                                                                                                                   |
| qPCR primer ULBP1_F   | GGCAGATGAGGAGAGTTGTTT                                                                                                                                                                                                                                                                                                                                                                                                                                  |
| qPCR primer ULBP1_R   | AGGACCCAGACCAGGCTAAC                                                                                                                                                                                                                                                                                                                                                                                                                                   |
| qPCR primer ULBP2_F   | CGTACCAAGATCCTTCTGTG                                                                                                                                                                                                                                                                                                                                                                                                                                   |
| qPCR primer ULBP2_R   | AAGAGAGTGAGGGTCGGC                                                                                                                                                                                                                                                                                                                                                                                                                                     |
| qPCR primer ULBP3_F   | CGCTCCTGGTCTACAATGGC                                                                                                                                                                                                                                                                                                                                                                                                                                   |
| qPCR primer ULBP3_R   | TCTGGGCAAATGAATGATGGTG                                                                                                                                                                                                                                                                                                                                                                                                                                 |
| qPCR primer CD48_F    | GAGCAGCAAGAATGGCAGC                                                                                                                                                                                                                                                                                                                                                                                                                                    |
| qPCR primer CD48_R    | TCATCTCAGGTAAGTAACAGGC                                                                                                                                                                                                                                                                                                                                                                                                                                 |
| qPCR primer CD58_F    | GTTCTTTCTTTATGTGCTTGAGTCT                                                                                                                                                                                                                                                                                                                                                                                                                              |
| qPCR primer CD58_R    | TGGCTGTTGTAATGCTCTGGT                                                                                                                                                                                                                                                                                                                                                                                                                                  |
| qPCR primer CLEC2B_F  | CCACTCAACATGCCGACCTA                                                                                                                                                                                                                                                                                                                                                                                                                                   |
| qPCR primer CLEC2B_R  | TGCCATCTTCAGTCCAATCCA                                                                                                                                                                                                                                                                                                                                                                                                                                  |
| qPCR primer BAG6_F    | CACCCAACCATCCTTCCCCT                                                                                                                                                                                                                                                                                                                                                                                                                                   |
| qPCR primer BAG6_R    | CACCCAGAACCTCGTAGTAGC                                                                                                                                                                                                                                                                                                                                                                                                                                  |

**Supplemental Table 2.** List of flowcytometry markers

| Marker            | Fluorophore  | Clone     | Manufacturer                                             |
|-------------------|--------------|-----------|----------------------------------------------------------|
| CD107a            | BUV395       | H4A3      | BD Bioscience                                            |
| NKG2D             | Unconjugated | BAT221    | Miltenyi Biotec                                          |
| CD3               | PerCP-Cy5.5  | SK7       | BD Bioscience                                            |
| CD56              | BV711        | NCAM 16.2 | BD Bioscience                                            |
| KIR2DL1/2         | APC          | NKVFS-1   | Miltenyi Biotec                                          |
| KIRD3DL1/2        | APC          | REA970    | Miltenyi Biotec                                          |
| NKG2A             | PE           | Z199      | Beckman Coulter                                          |
| NKp44             | Unconjugated | KS38      | Kindly provided by Prof. Silvia Parolini, Brescia, Italy |
| NKp46             | Unconjugated | KL247     | Kindly provided by Prof. Silvia Parolini, Brescia, Italy |
| NKp30             | Unconjugated | F252      | Kindly provided by Dr. Daniela Pende, Genoa, Italy       |
| DNAM-1            | Unconjugated | F5        | Kindly provided by Dr. Daniela Pende, Genoa, Italy       |
| IFN $\gamma$      | BUV395       | B27       | BD Bioscience                                            |
| Granzyme B        | BV421        | GB11      | BD Bioscience                                            |
| B7-H6             | Unconjugated | 17B1.3    | Kindly provided by Prof. Eric Vivier, Marseille, France  |
| PVR               | Unconjugated | 5A10      | Kindly provided by Moretta lab, Genoa, Italy             |
| Nectin-2          | Unconjugated | L14       | Kindly provided by Moretta lab, Genoa, Italy             |
| MICA/B            | Unconjugated | 6D4       | Miltenyi Biotec                                          |
| ULBP1             | Unconjugated | 170818    | R&D Systems                                              |
| ULBP2,5,6         | Unconjugated | 165903    | R&D Systems                                              |
| ULBP4             | Unconjugated | 6E6       | Santa Crus Biotechnology                                 |
| Live/Dead near IR | NA           | NA        | Invitrogen                                               |
| CellTrace Violet  | NA           | NA        | Invitrogen                                               |
